# Supplementary material for: Estimating Traffic Disruption Patterns with Volunteered Geographic Information
Source: PubMed Central journal article supplement (PMC6985234; doi:10.1038/s41598-020-57882-2), 2020-01-27
Supplement: 41598_2020_57882_MOESM1_ESM.pdf [file 41598_2020_57882_MOESM1_ESM.pdf]

# Estimating Traffic Disruption Patterns with Volunteered Geographic Information

Chico Q. Camargo<sup>1</sup>, Jonathan Bright<sup>1</sup>, Graham McNeill<sup>1</sup>, Sridhar Raman<sup>2</sup>, Scott A. Hale<sup>1,3,\*</sup>

<sup>1</sup>Oxford Internet Institute, University of Oxford, Oxford, United Kingdom

<sup>2</sup>Oxford Brookes University, Oxford, United Kingdom

<sup>3</sup>Alan Turing Institute, London, United Kingdom

\*scott.hale@oii.ox.ac.uk

## Supplementary Information

| Variable       | Estimate  | Variable       | Estimate |
|----------------|-----------|----------------|----------|
| Commercial     | 0.0227*** | Parking        | 0.040*** |
| Recreational   | -0.0303** | House          | 0.005*   |
| Institutional  | 0.0087    | ...            |          |
| Green space    | 0.0026    | Pitch          | -0.007   |
| Industrial     | -0.0005   | Farmyard       | -0.008   |
| Residential    | -0.0084   | Pub            | -0.013   |
| Observations   | 112       | Observations   | 112      |
| Adjusted $R^2$ | 0.26      | Adjusted $R^2$ | 0.45     |

(a) Meta-categories only                      (b) Granular model

\*  $p < 0.05$ , \*\*  $p < 0.01$ , \*\*\*  $p < 0.001$

**Table S1: Coefficients for the linear regression model for the incoming traffic for every ward.** The traditional land-use categories shown in (a) that produce an adjusted  $R^2 = 0.26$ , while the granular classifications used in (b) increase the adjusted  $R^2$  to 0.45. Only a small subset of the 40 predictor variables are shown for (b). Entries without \* have p-values in excess of 0.05.

|               | ranking | stability |             | ranking | stability |
|---------------|---------|-----------|-------------|---------|-----------|
| commercial    | 1.000   | 1.000     | clothes     | 1.000   | 1.000     |
| recreational  | 1.028   | 0.972     | bench       | 1.000   | 1.000     |
| institutional | 1.113   | 0.915     | supermarket | 1.022   | 0.978     |
| green space   | 1.506   | 0.607     | post box    | 1.146   | 0.876     |
| residential   | 2.048   | 0.458     | playground  | 1.317   | 0.829     |
| industrial    | 2.839   | 0.209     | fast food   | 1.525   | 0.792     |

(a) Meta-categories, total traffic volume                      (b) Granular model, total traffic volume

**Table S2: Average ranking and stability of different meta-categories in predicting the traffic volume for every Oxfordshire ward, for trips at any time of the day.** Only the top 6 OSM categories are shown in (b). The ranking and stability results are similar to the ones obtained when only selecting trips on weekday mornings.

| OSM category    | Coefficient | OSM category | Coefficient | OSM category      | Coefficient | OSM category | Coefficient |
|-----------------|-------------|--------------|-------------|-------------------|-------------|--------------|-------------|
| allotments      | 0.0778 **   | farmland     | 0.555 ***   | park              | -0.011      | residential  | 0.6092 ***  |
| apartments      | -0.0908 **  | farmyard     | 0.3094 ***  | parking           | 0.2406 ***  | restaurant   | 0.0079      |
| bench           | 0.0372      | fast food    | 0.0502      | pitch             | 0.0811 *    | retail       | 0.0482      |
| bicycle parking | 0.029       | forest       | 0.236 ***   | place of worship  | 0.0088**    | school       | 0.0422**    |
| cafe            | -0.0727 *   | garage       | -0.0146     | playground        | -0.028      | soccer       | 0.0937 *    |
| clothes         | 0.0659      | garden       | -0.067      | post box          | 0.0786 **   | supermarket  | -0.0689 *   |
| commercial      | 0.0765 **   | grass        | 0.0241      | pub               | -0.0425     | telephone    | -0.0291     |
| convenience     | -0.0028     | house        | 0.0639 *    | recreation ground | 0.0269      | tennis       | 0.071       |
| entrance        | -0.0453     | industrial   | 0.1388 ***  | recycling         | -0.0028     | terrace      | -0.0426     |
| farm            | 0.2515 ***  | meadow       | 0.1846 ***  | reservoir         | 0.1166      | university   | 0.1179 **   |

**Table S3: All coefficients of the granular model of traffic disruptions.**

Respectively, \*, \*\* and \*\*\* indicate  $p < 0.05$ ,  $p < 0.01$  and  $p < 0.001$ .
